# Supplementary material for: Metal-ion induced transition from multi- to single-bilayer tubes in histidine bearing lipids and formation of monodisperse Au nanoparticles
Source: Royal Society of Chemistry journal article supplement (doi:10.1039/c1cp21065c), 2011-01-01
Supplement: c1cp21065c.pdf [file c1cp21065c.pdf]

# Supporting Information

## **Metal-Ion Induced Transition from Multi- to Single-Bilayer Tubes in Histidine Bearing Lipids and Formation of Monodisperse Au Nanoparticles**

*Tomoki Nishimura, Takuma Matsuo and Kazuo Sakurai \**

Department of Chemistry and Biochemistry, University of Kitakyushu, 1-1, Hibikino,  
Wakamatsu-ku, Kitakyushu, Fukuoka 808-0135, Japan. E-mail: sakurai@env.kitakyu-u.ac.jp  
E-mail : sakurai@env.kitakyu-u.ac.jp

## *Synthesis of cationic lipid HisL*

### **3,5-Bis-dodecyloxy benzonitrile 1:**

A solution of 3,5-dihydroxybenzonitrile (5.19g, 38.4mmol), 1-bromododecane (23.93g, 96.0mmol) and  $K_2CO_3$  (26.5g, 192.0mmol) were stirred at 80°C in dry DMF for 12h under a nitrogen atmosphere. The reaction mixture was cooled to room temperature, 10mL of water was added and aqueous layer was extracted with dichloromethane. Organic layer was washed with brine and water, dried over  $MgSO_4$ , filtered. The solvent was removed *in vacuo*. The Product was isolated by chromatography on silica gel using 1:1 dichloromethane - Hexane as eluant. The product was white powder (17.8g, 98%).  $^1H$ -NMR ( $CDCl_3$ , 500 MHz,  $\delta$  ppm): 0.88 (t, J = 6.5, 6H,  $CH_2CH_3$ ); 1.26-1.47 (m, 35H,  $CH_2$  (dodecyloxy)), 1.77 (m, 4H,  $OCH_2CH_2$ ), 3.93 (t, J = 6.5, 4H,  $OCH_2CH_2$ ), 6.64 (s, 1H, ArH), 6.73 (s, 2H, ArH)

### **3,5-Bis-dodecyloxy benzylamine 2:**

Prepared a suspension of  $LiAlH_4$  (0.406g, 10.7mmol) in 20 mL of dry Diethyl ether. Stirred at 0°C. Added a solution of 1 (2.0g, 4.2mmol) in 25 mL of Diethyl ether. After addition the reaction mixture was stirred at room temperature for 5 h under a nitrogen atmosphere. The reaction mixture was then cooled to 0°C and quenched by the sequential addition of 0.4 mL of  $H_2O$ , 0.4 mL of 15w/v% aq. NaOH and 1.2mL of  $H_2O$ . The mixture was then poured into 50 mL of dichloromethane and stirred for 30 min. The insoluble material was removed by filtration through Celite and the solvent was removed from the filtrate by rotary evaporation. The product was isolated by flash chromatography on silica gel using 10:1 dichloromethane-methanol as eluant. The product was white powder (1.76g, 88%).  $^1H$ -NMR ( $CDCl_3$ , 500 MHz,  $\delta$  ppm): 0.88 (t, J = 6.5, 6H,  $CH_2CH_3$ ); 1.26-1.47 (m, 35H,  $CH_2$  (dodecyloxy)), 1.76 (m, 4H,  $OCH_2CH_2$ ), 3.79 (s, 2H,  $ArCH_2$ ), 3.93 (t, J = 6.5, 4H,  $OCH_2CH_2$ ), 6.34 (s, 1H, ArH), 6.44 (s, 2H, ArH)

### **[1-(3,5-Bis-dodecyloxy benzylcarbamoyl)-2-(1H-imidazol-4-yl)-ethyl]-carbamic acid tert-butyl ester 3:**

To a mixture of 2 (1.65g, 3.48 mmol) and L-Boc-Histidine (0.99g, 4.35mmol) in 10mL of dry chloroform, HOBT- $H_2O$  (0.65g, 4.81mmol) and EDC-HCl (0.92g, 4.81mmol) in 10mL of chloroform were added. After stirred at room temperature for 40h, the reaction mixture was poured into 10% citric acid and extracted with dichloromethane. The organic layer was washed with sat. aq.  $NaHCO_3$ , brine, and water, dried over  $MgSO_4$  and filtered. The solvent was removed by rotary evaporation. The product was isolated by flash chromatography on silica gel using 10:1 dichloromethane -methanol as eluant. The product was viscous oil (1.12g, 45%).  $^1H$ -NMR ( $CDCl_3$ , 500 MHz,  $\delta$  ppm): 0.88 (t, J = 6.5, 6H,  $CH_2CH_3$ ); 1.26-1.39 (m, 35H,  $CH_2$

(dodecyloxy), 1.42 (m, 9H, OC(CH<sub>3</sub>)<sub>3</sub>), 1.74 (m, 4H, OCH<sub>2</sub>CH<sub>2</sub>), 2.96-3.20 (m, 2H, ArCH<sub>2</sub>NH), 3.88 (t, J = 6.5, 4H, OCH<sub>2</sub>CH<sub>2</sub>), 4.22-4.36 (m, 2H, CH<sub>2</sub>CHNHCO), 4.46 (s, 1H, CH<sub>2</sub>CHNHCO), 6.24 (s, 2H, ArH), 6.32 (s, 1H, ArH), 6.79 (s, 1H, C=CHNH), 7.49 (s, 1H, NHCHN)

**2-Amino-N-(3,5-bis-dodecyloxy-benzyl)-3-(1H-imidazol-4-yl)-propionamide (HisL):**

To a solution of 3 (1.14g, 1.57mmol) in 2mL of dichloromethane, a total of 10 mL of TFA was added. The mixture was stirred for 30 min at room temperature. The solvent was removed by rotary evaporation. To the residue, a total of 5 mL of dichloromethane was added with stirring and was evaporated. This was repeated to yield 940 mg (1.53 mmol, 97%) of HisL as pale yellow oil. <sup>1</sup>H-NMR (CDCl<sub>3</sub>, 500 MHz, δ ppm): 0.87 (t, J = 6.8, 6H, CH<sub>2</sub>CH<sub>3</sub>); 1.26-1.40 (m, 35H, CH<sub>2</sub>(dodecyloxy)), 1.74 (m, 4H, OCH<sub>2</sub>CH<sub>2</sub>), 3.24-3.41 (m, 2H, ArCH<sub>2</sub>NH), 3.83 (t, J = 6.5, 4H, OCH<sub>2</sub>CH<sub>2</sub>), 4.13-4.31 (m, 2H, CH<sub>2</sub>CHNHCO), 4.48 (s, 1H, CH<sub>2</sub>CHNHCO), 6.29 (s, 2H, ArH), 6.31 (s, 1H, ArH), 7.16 (s, 1H, C=CHNH), 8.29 (s, 1H, NHCHN)

Fig. S1

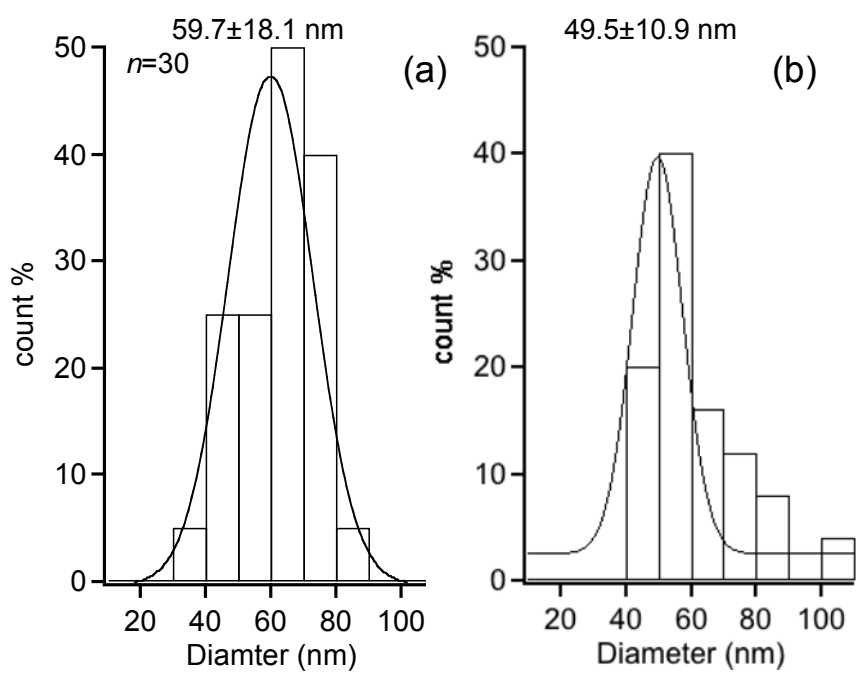

Fig. S1 The size distributions of HiL nanotube (a) and metal ion/HisL nanotube

Fig. S2

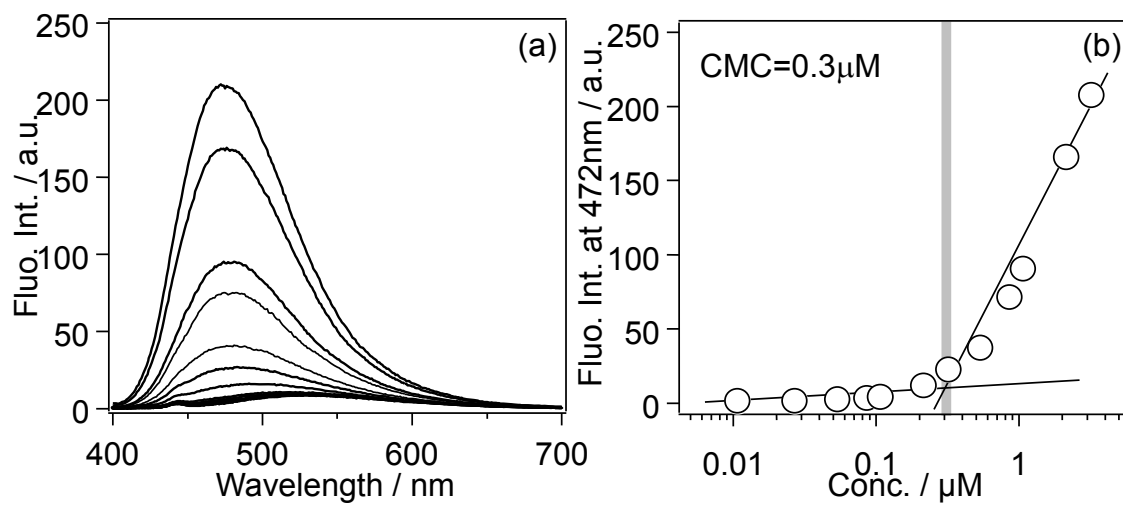

Fig. S2 (a) Fluorescence spectra of ANS in water at various concentrations of HisL, (b) Plots of fluorescence intensity at 472 nm versus concentration of HisL.

Fig. S3

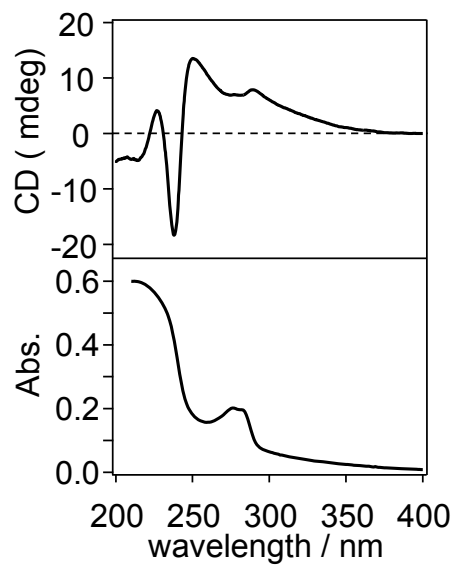

Fig. S3 CD and UV spectra for HisL (0.1mM)

Fig. S4

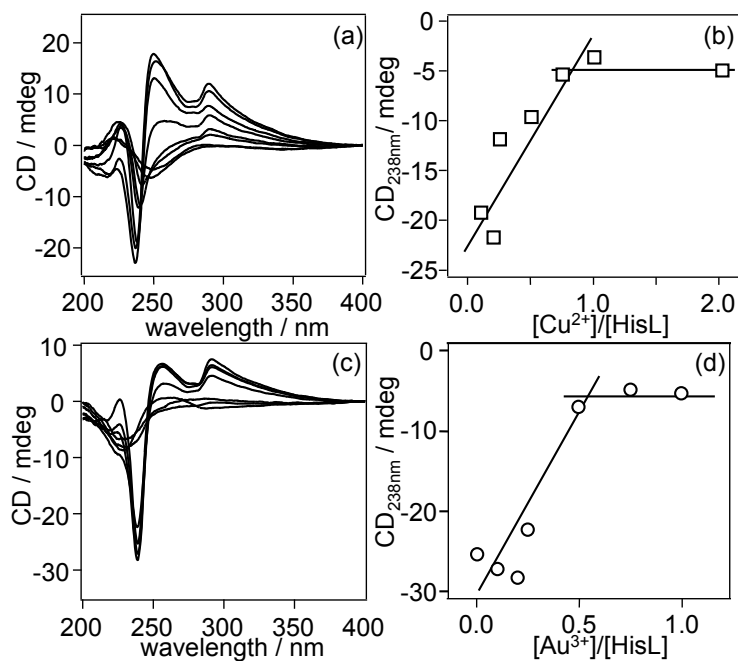

Fig. S4 Metal ions concentration dependence of the CD spectra of HisL in water and the difference of the CD spectra intensity at 238 nm plotted against molar ratio for Cu<sup>2+</sup> / HisL (a), (b) and Au<sup>3+</sup> / HisL (c), (d).

Fig. S5

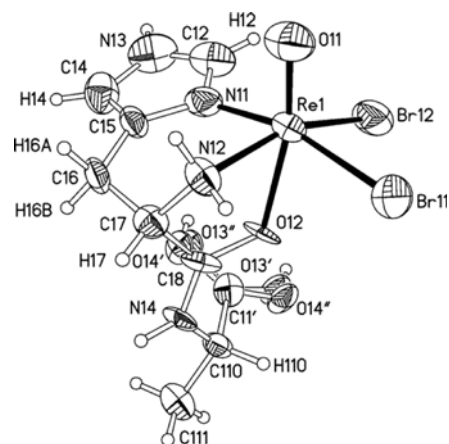

Fig. S5 Crystal structure of Ru<sup>5+</sup>/His-Ala complex.



Fig. S6

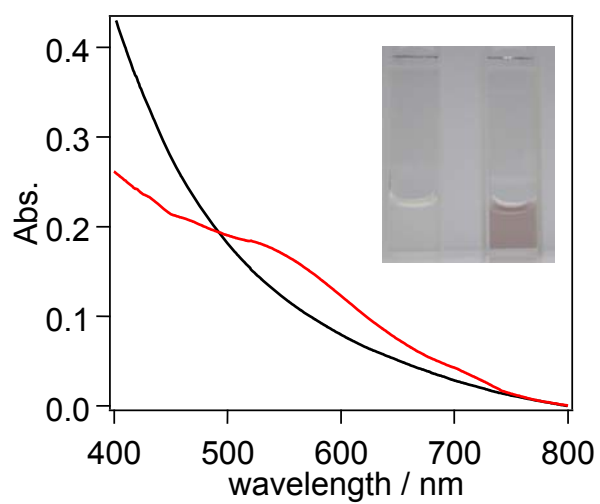

Fig. S6. UV-Vis absorption spectra of Au<sup>3+</sup>/HisL (black) and after reduction of Au<sup>3+</sup>/HisL (red)

Fig. S7

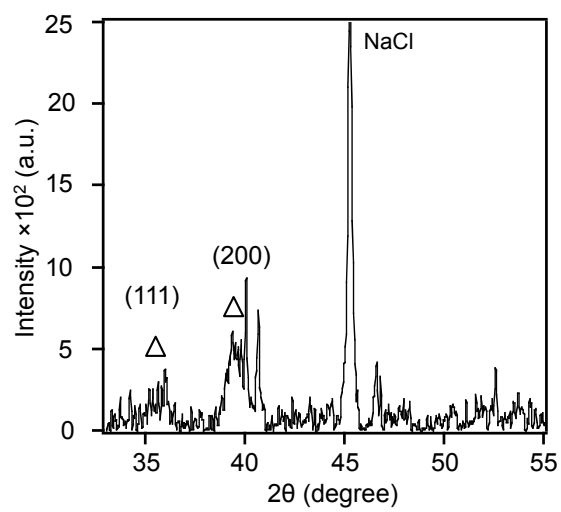

Fig. S7 XRD for Cu/HisL complex
